# Supplementary material for: CD4 CAR-T cells targeting CD19 play a key role in exacerbating cytokine release syndrome, while maintaining long-term responses
Source: PubMed Central journal article supplement (PMC9809278; doi:10.1136/jitc-2022-005878), 2023-01-02
Supplement: jitc-2022-005878supp001.pdf [file jitc-2022-005878supp001.pdf]

**1 Supplementary Material****2 Supplementary Methods****3 Antibodies employed for FACS analysis**

4 CD3 PB (Biolegend, clone HIT3a), CD45 BV510 (Biolegend, clone HI30), CD271 PE-Cy7 (BD,  
5 clone CD40-1457), CD271 PE (BD, clone C40-1457), CD4 FITC (Biolegend, clone SK3), anti-  
6 mouse CD45 PerCP (Biolegend, clone 30-f11), CD14 APC (Biolegend, clone M5E2), CD19  
7 APC/Cy7 (Biolegend, clone HIB19), CD56 PE-Cy7 (Biolegend, clone HCD56), HLA-DR  
8 APC/Cy7 (Biolegend, clone L243), CD45RA FITC (Biolegend, clone HI100), CD62L APC  
9 (Biolegend, clone DREG-56), CD8 PerCP (BD, clone SK1), CD107a FITC (Biolegend, clone  
10 H4A3), Ki-67 Pacific Blue (Biolegend clone KI-67), CD69 APC (Biolegend, clone FN50), CD25  
11 APC/Cy7 (Biolegend, clone BC96), CD163 FITC (Biolegend, clone GHI/61), CD54 PE  
12 (Biolegend, clone HA58), CD80 PE-Cy7 (Biolegend, clone 2D10) and CD86 APC (Biolegend,  
13 clone IT2.2).

**14 Supplementary Figures**

15 **Supplemental Figure 1.** Transduction levels and killing ability of CD4 and CD8 CAR-T cells

16 **Supplemental Figure 2.** Tripartite *in vitro* co-cultures with monocyte-like THP-1 cells

17 **Supplemental Figure 3.** Antitumor activity, T-cell expansion and survival rates related to severe  
18 CRS in tumor-bearing HuSGM3 mice treated with CD4 and CD8 CAR-T cell products

19 **Supplemental Figure 4.** Antitumor activity and survival rates related to severe CRS in tumor-  
20 bearing HuSGM3 mice treated with differentially co-stimulated CD4:CD8 1:1 CAR-T cell products

21

22

23

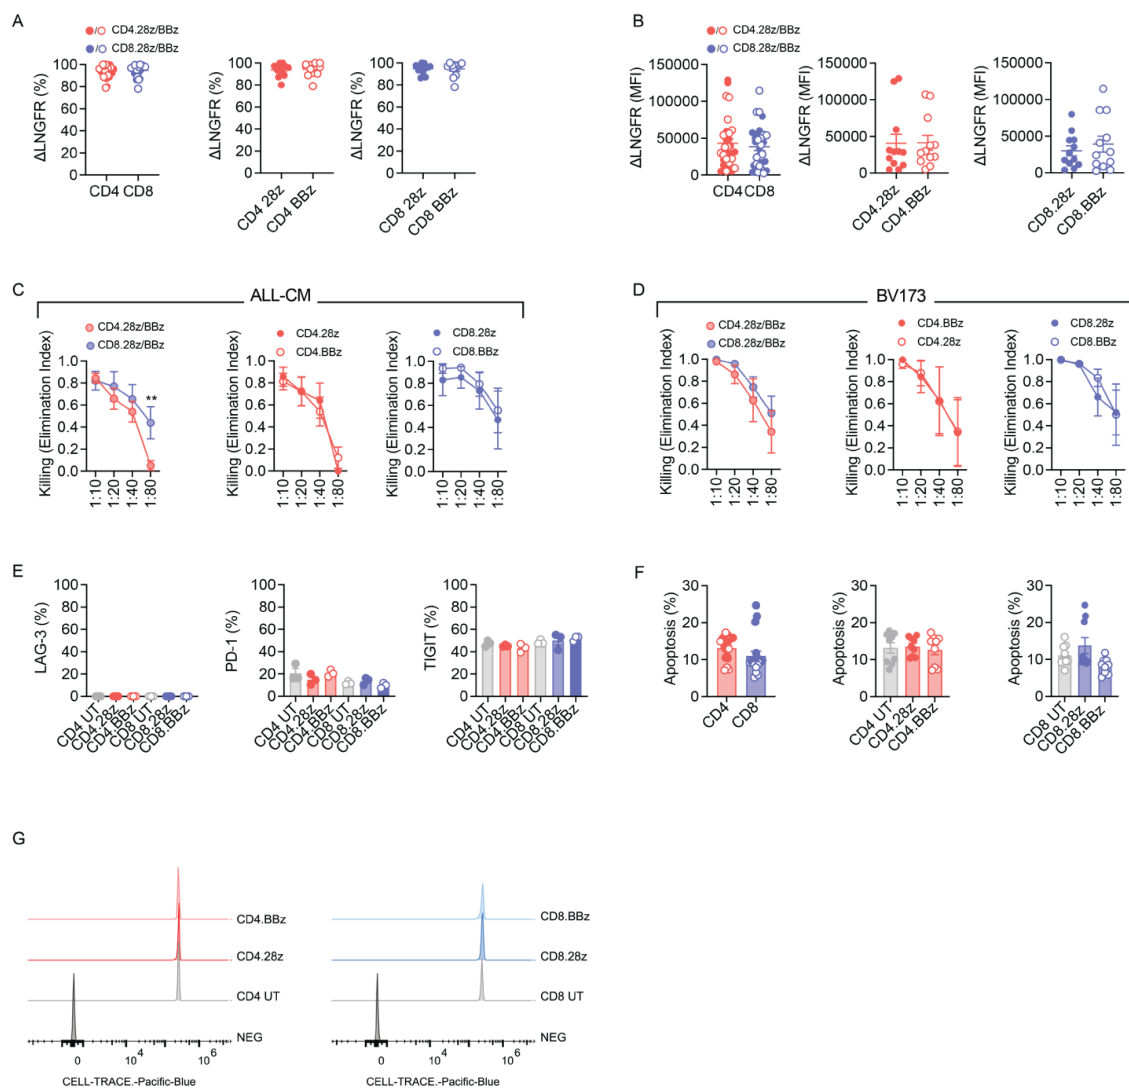

24

25 **Supplemental Figure 1. Transduction levels, killing ability and tonic signaling of CD4 and**26 **CD8 CAR-T cells. ΔLNGFR marker expression reported as (A) percentage and (B) MFI at the end**27 **of manufacturing (n=12). (C) Killing activity expressed as elimination index (see Methods) and**28 **measured by co-culturing CD4.28z (n=3), CD4.BBz (n=3), CD8.28z (n=3) and CD8.BBz (n=3)**29 **with CD19+ ALL-CM cells for 4 days at different effector/target (E:T) ratios. (D) Killing activity**30 **measured by co-culturing CD4.28z (n=3), CD4.BBz (n=3), CD8.28z (n=3) and CD8.BBz (n=3)**31 **with CD19+ BV173 cells for 4 days at different effector/target (E:T) ratios. (E) LAG-3, PD-1 and**32 **TIGIT exhaustion markers expression at the end of manufacturing (n=3). (F) Apoptosis analysis at**33 **the end of manufacturing (n=3). (G) Antigen-independent proliferation expressed as Cell-Trace**

2

34 dilution (n=3). Data are represented as mean  $\pm$  SEM or mean  $\pm$  SEM together with overlapping  
35 scattered values. By paired t test or 2-way ANOVA.

36

37

38

39

40

41

42

43

44

45

46

47

48

49

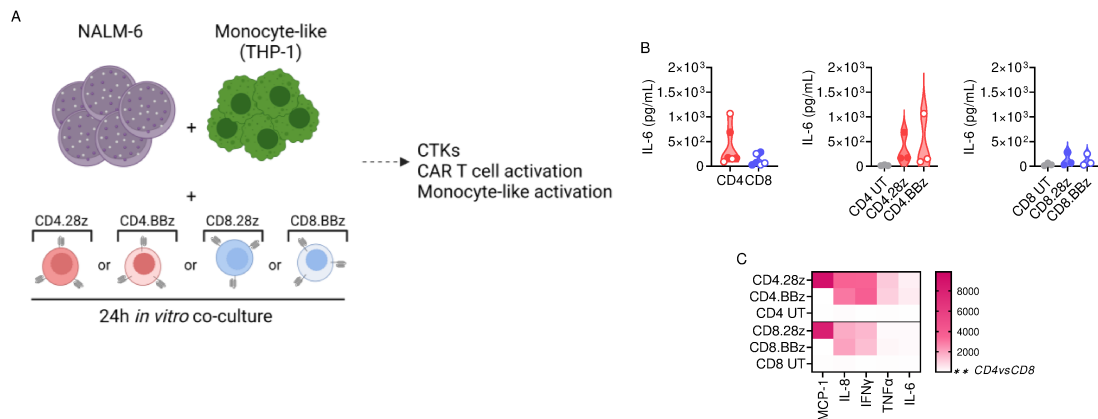

50

51 **Supplemental Figure 2. Tripartite *in vitro* co-cultures with monocyte-like THP-1 cells. A)**

52 Schematic representation of tripartite co-cultures consisting of NALM-6 leukemia cells, CD4 or

53 CD8 CAR-T cells and the monocyte-like THP-1 cell line. **B)** IL-6 production and **(C)** heatmap54 visualization of cytokine release 24 hours after plating (n=3). Data are represented as mean  $\pm$  SEM

55 together with overlapping scattered values. \*\*\*P &lt; 0.01, by paired t test or 2-way ANOVA.

56

57

58

59

60

61

62

63

64

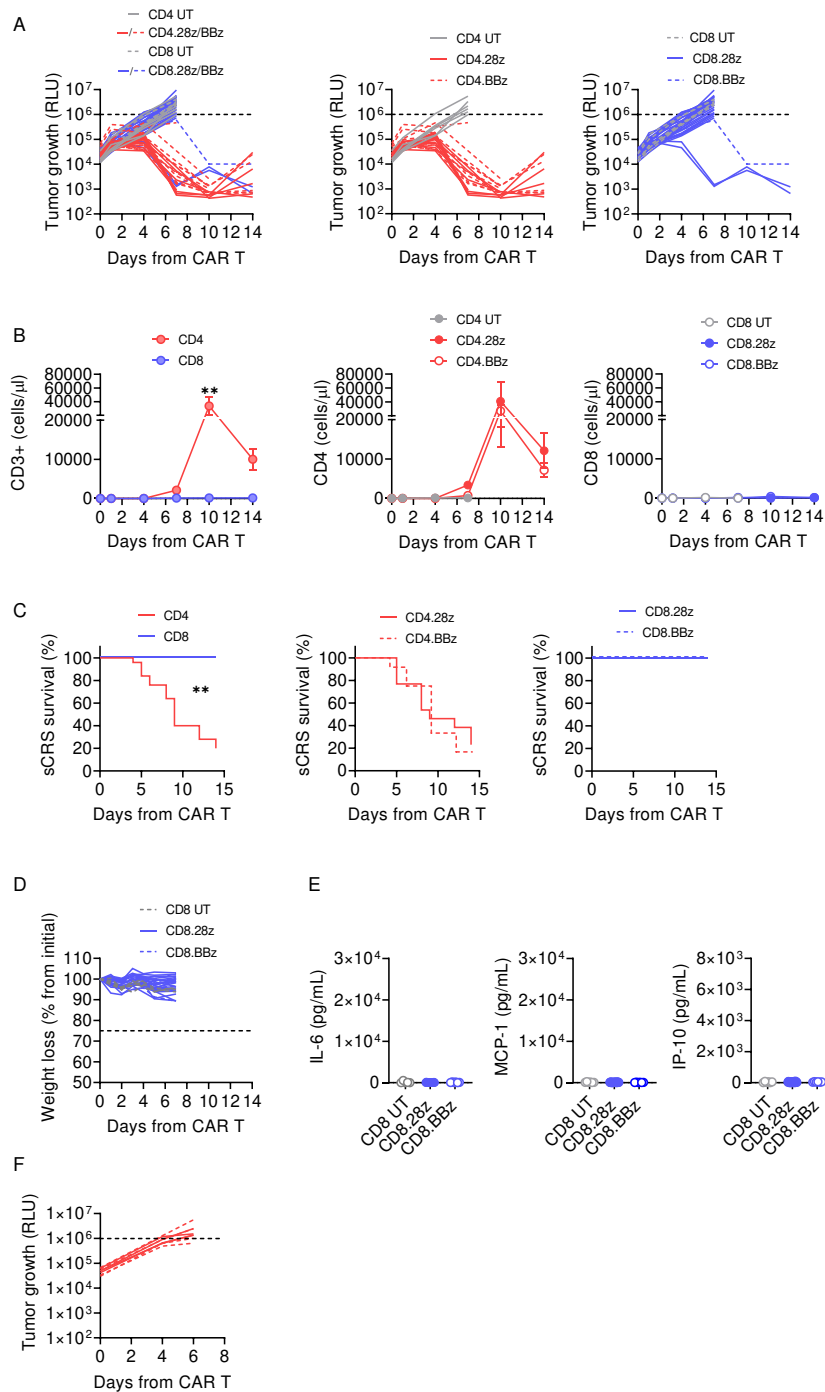

65

66 **Supplemental Figure 3. Antitumor activity, T-cell expansion and survival rates related to**  
 67 **severe CRS in tumor-bearing HuSGM3 mice treated with CD4 and CD8 CAR-T cell**  
 68 **products. A-C) Additional data from the experiment reported in Figure 3A-F. A)**

5

69 LUCIA+/NGFR+/NALM-6 bioluminescence signal measured at different time points after  
70 treatment with CD4 UT (n=6), CD4.28z (n=13), CD4.BBz (n=12), CD8 UT (n=6), CD8.28z (n=24)  
71 and CD8.BBz (n=7) and expressed as relative light units (RLU). **B**) CAR-T cell expansion peak  
72 monitored in the peripheral blood of mice receiving CD4 UT (n=6), CD4.28z (n=13), CD4.BBz  
73 (n=12), CD8 UT (n=6), CD8.28z (n=2) and CD8.BBz (n=1). **C**) sCRS-related Kaplan-Meier  
74 survival analysis of mice treated with CD4.28z (n=13), CD4.BBz (n=12), CD8.28z (n=24) and  
75 CD8.BBz (n=7). **D**) Weight loss and **E**) IL-6, MCP-1 and IP-10 serum levels in mice who did not  
76 achieve tumor control after treatment with CD8 UT (n=6), CD8.28z (n=22) and CD8.BBz (n=5). **F**)  
77 Additional data from the experiment reported in Figure 3G and H. LUCIA+/NGFR+/NALM-6  
78 bioluminescence signal measured at different time points after treatment with CD4.28z (n=4) and  
79 CD4.BBz (n=4). Data are represented as mean  $\pm$  SEM together with individual and overlapping  
80 scattered values. \*\*P < 0.01 by 2-way ANOVA, unpaired t test and Mantel-Cox 2-sided log-rank  
81 test were performed.

82

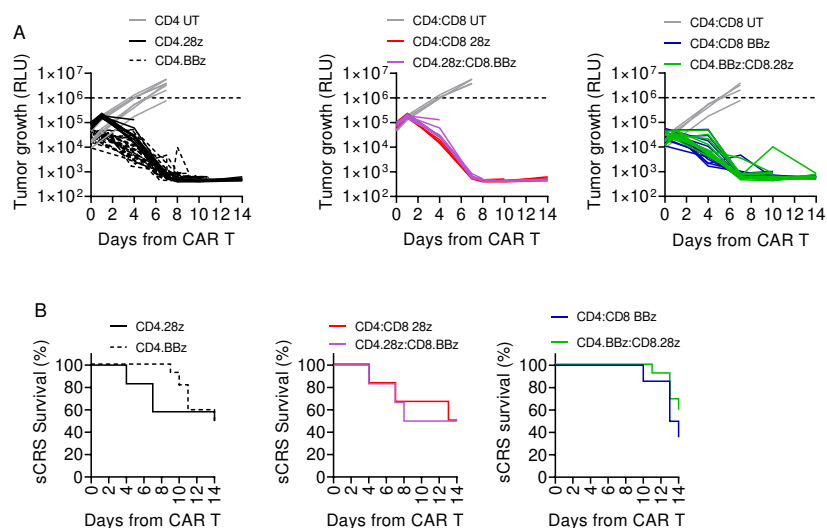

83

84 **Supplemental Figure 4. Antitumor activity and survival rates related to severe CRS in tumor-**  
 85 **bearing HuSGM3 mice treated with differentially co-stimulated CD4:CD8 1:1 CAR-T cell**  
 86 **products.** Additional data from the experiment reported in Figure 5. **A)** LUCIA+/NGFR+/NALM-6  
 87 bioluminescence signal measured at different time points after treatment with CD4:CD8 UT (n=8),  
 88 CD4:CD8 28z (n= 6), CD4.28z:CD8.BBz (n=6), CD4:CD8 BBz (n= 14) and CD4.BBz:CD8.28z  
 89 (n=13). **B)** sCRS-related Kaplan-Meier survival analysis of mice. Data are represented as mean  $\pm$   
 90 SEM together with individual scattered values by 2-way ANOVA, unpaired t test, Mantel-Cox 2-  
 91 sided log-rank test.

7
